# Supplementary material for: Bidirectional tuning of phase transition properties in Pt : VO2nanocomposite thin films
Source: Royal Society of Chemistry journal article supplement (doi:10.1039/d0nr04008h), 2020-01-01
Supplement: d0nr04008h1.pdf [file d0nr04008h1.pdf]

## Supporting Information

### Bidirectional tuning of phase transition properties in Pt: VO<sub>2</sub> nanocomposite thin films

Zihao He<sup>a</sup>, Jie Jian<sup>b</sup>, Shikhar Misra<sup>b</sup>, Xingyao Gao<sup>b</sup>, Xuejing Wang<sup>b</sup>, Zhimin Qi<sup>b</sup>, Bo Yang<sup>b</sup>, Di Zhang<sup>b</sup>, Xinghang Zhang<sup>b</sup>, Haiyan Wang<sup>a,b\*</sup>

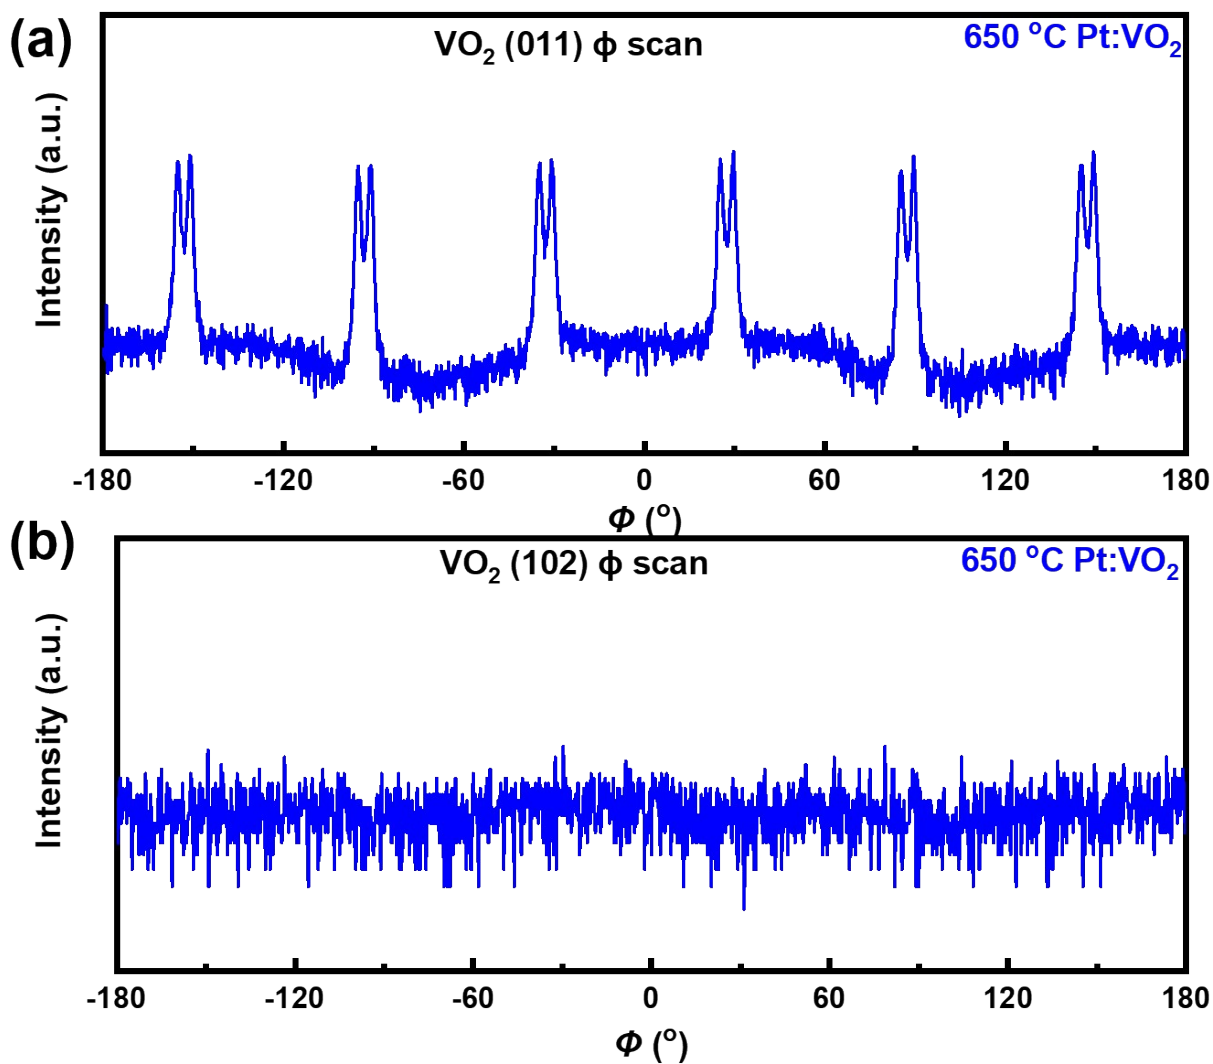

**Figure S1.** XRD  $\phi$ -scans of (a) (011) plane and (b) (102) plane of Pt: VO<sub>2</sub> nanocomposite thin film deposited at 650 °C.

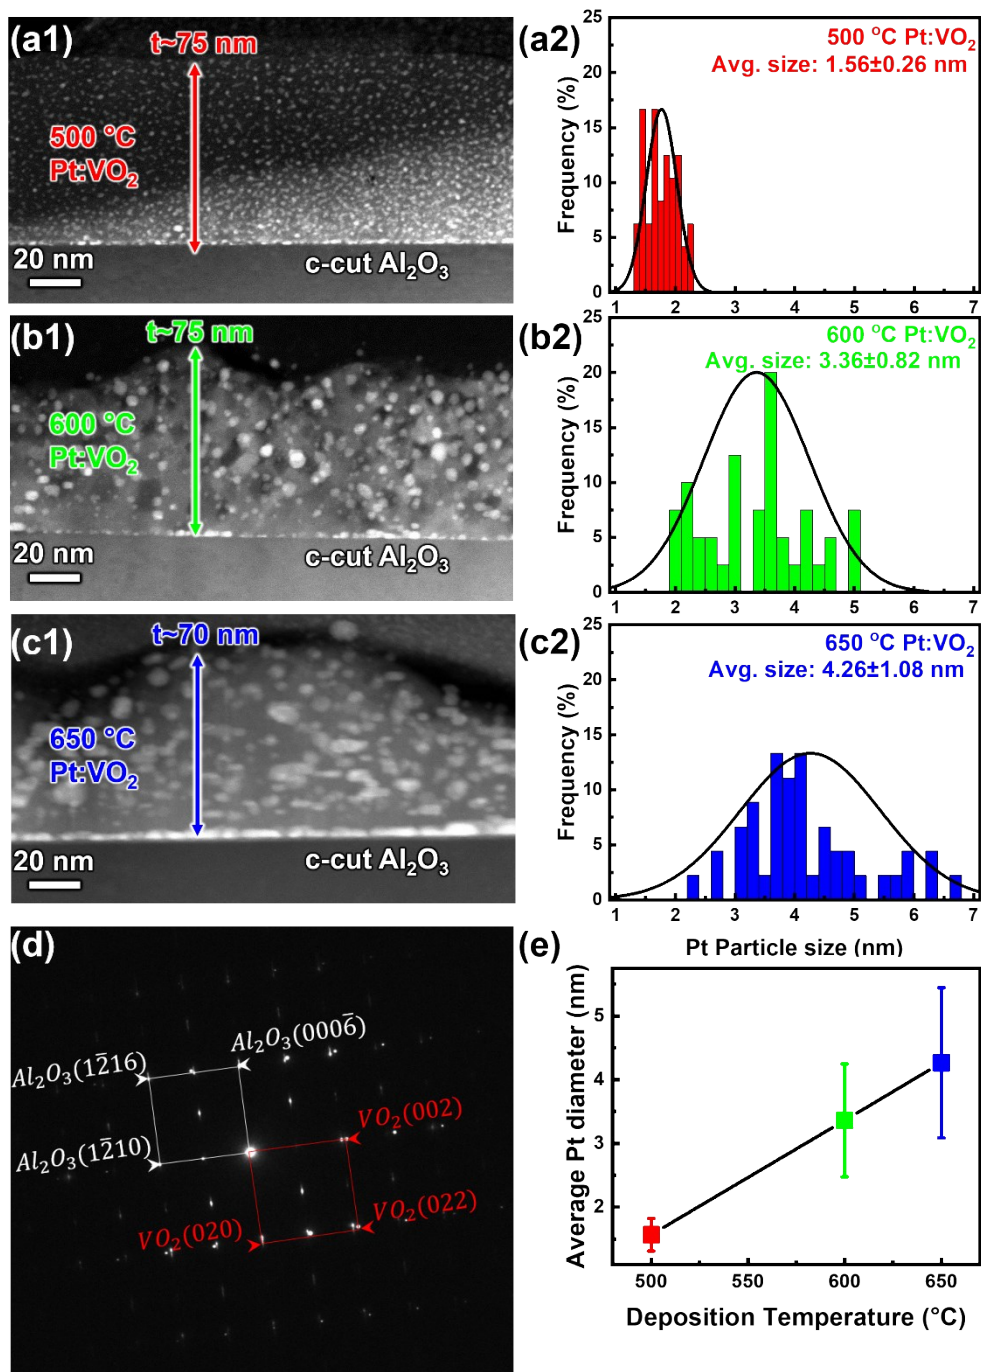

**Figure S2.** (a1, b1, c1) STEM cross-section images of the Pt: VO<sub>2</sub> nanocomposite thin films deposited at 500, 600, and 650 °C, respectively. (a2, b2, c2) The corresponding Pt NPs size distributions in all Pt: VO<sub>2</sub> nanocomposite thin films. (d) SAED pattern of the film and the substrate along the c-cut sapphire [10 $\bar{1}$ 0] zone for the 500 °C deposited Pt: VO<sub>2</sub> films. (e)

Relationship between average Pt NP size and the corresponding deposition temperatures. Average Pt NP size becomes larger at higher deposition temperature.

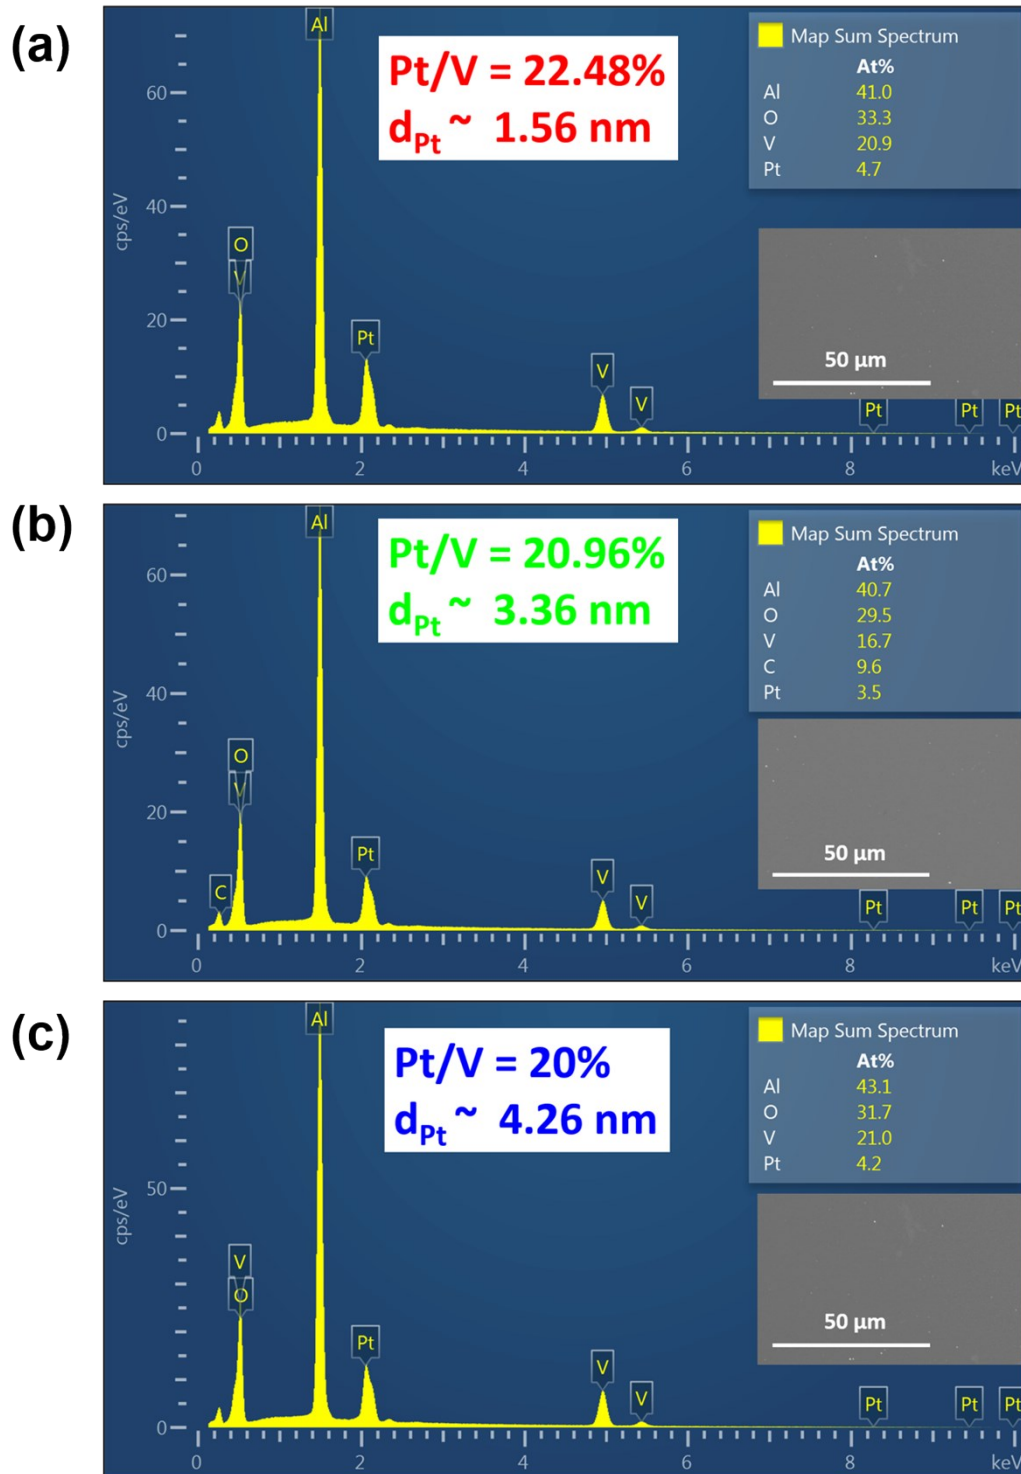

**Figure S3.** SEM-EDS mapping of the Pt/V atomic ratio in the Pt: VO<sub>2</sub> nanocomposite thin films with the average Pt NP diameter of (a) 1.56 nm, (b) 3.36 nm, and (c) 4.26 nm. The Pt/V atomic ratio is similar for all films.

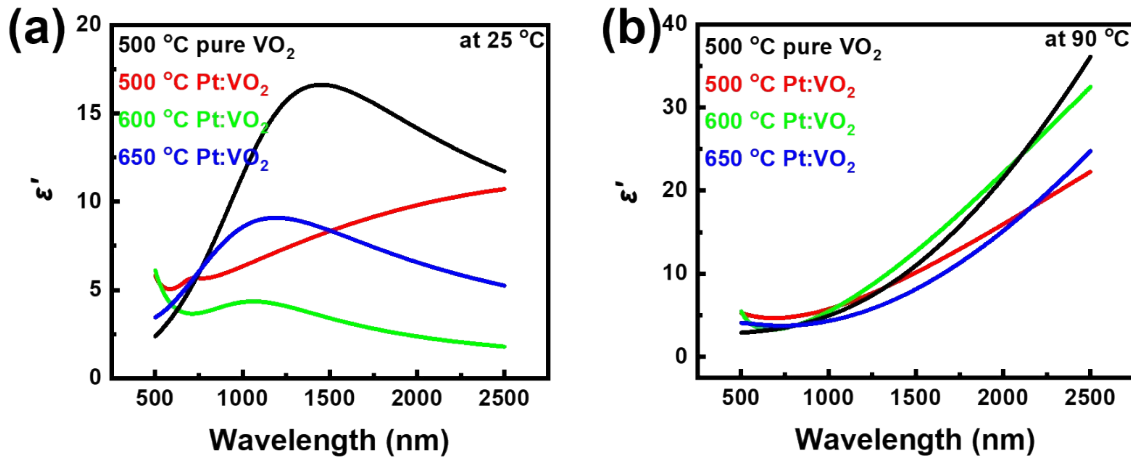

**Figure S4.** The imaginary part of dielectric permittivity  $\epsilon''$  (a) at 25 °C and (b) at 90 °C for Pt: VO<sub>2</sub> nanocomposite thin films deposited at 500, 600, and 650 °C, respectively.
